# Supplementary material for: Rapid Detection and Quantification of Patulin and Citrinin Contamination in Fruits
Source: MDPI journal article supplement (doi:10.3390/molecules26154545), 2021-07-27
Supplement: s1 [file s1]

Supplementary material

HPLC chromatogram of PAT in YES medium

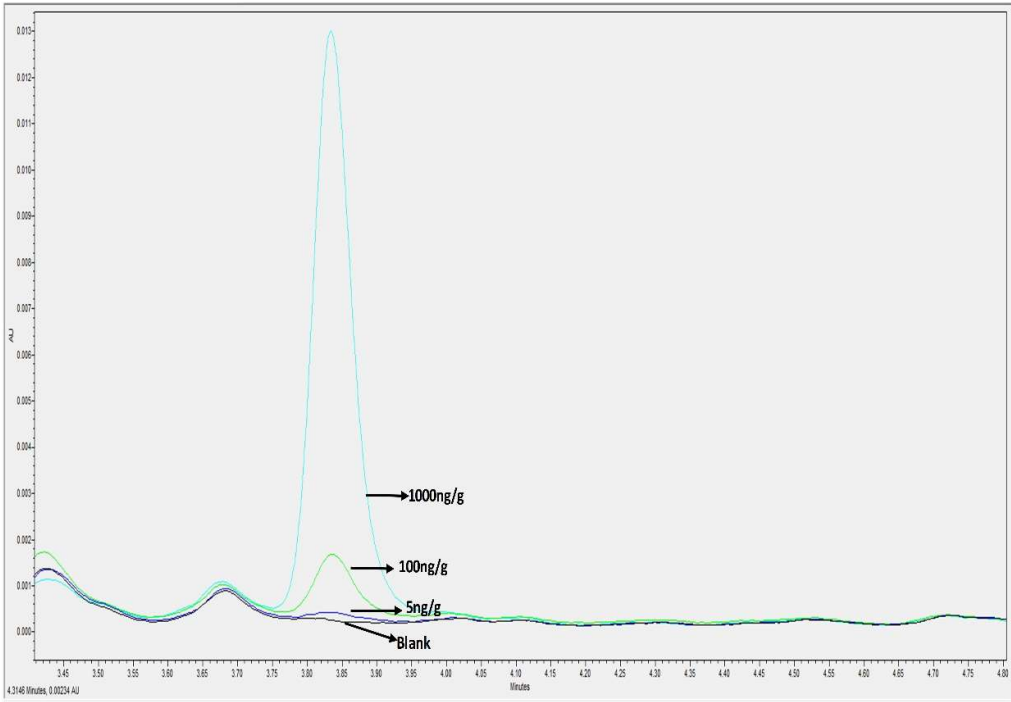

HPLC chromatogram of PAT in apple

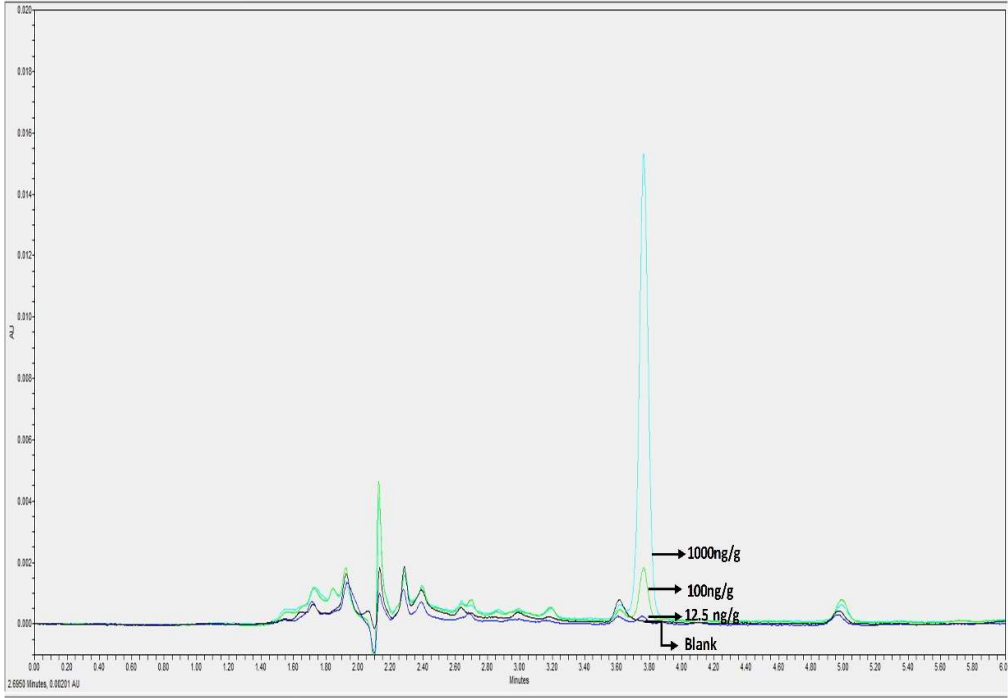

HPLC chromatogram of PAT in pear

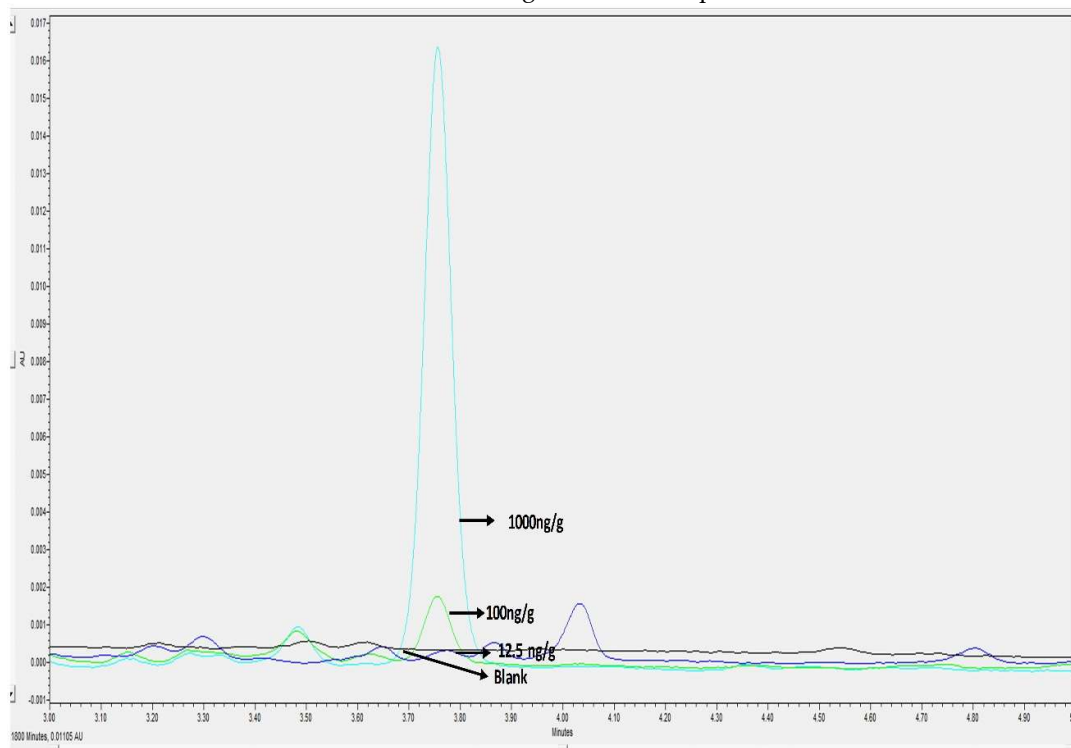

HPLC chromatogram of CTN in YES medium

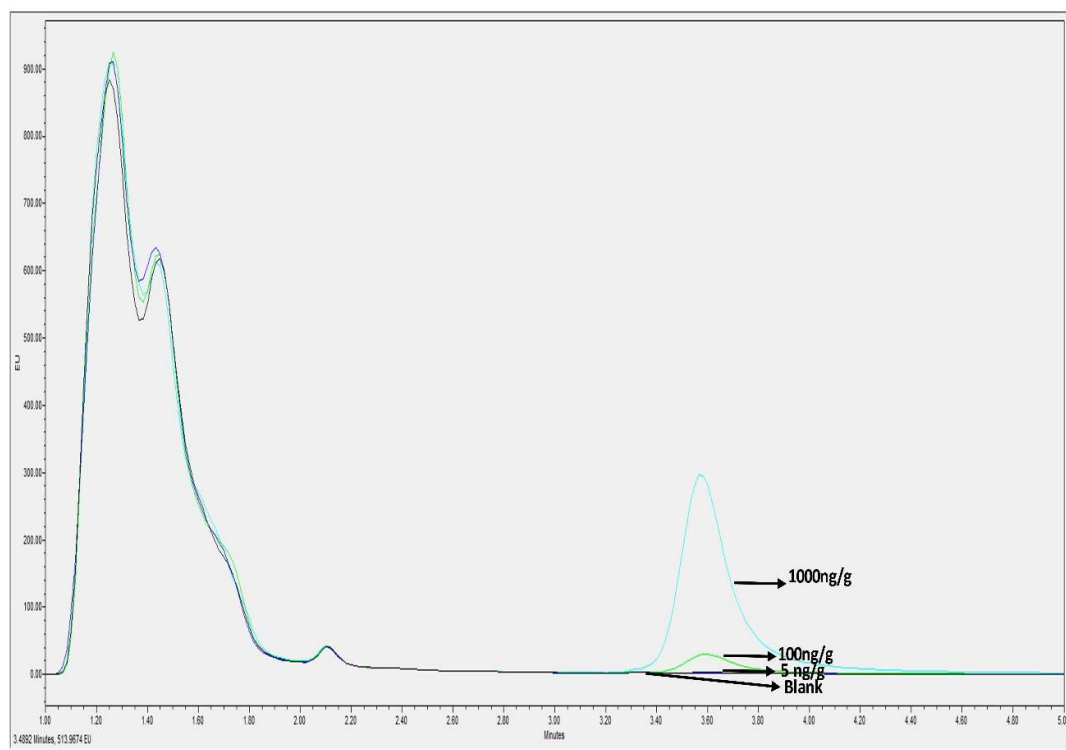

HPLC chromatogram of CTN in apple

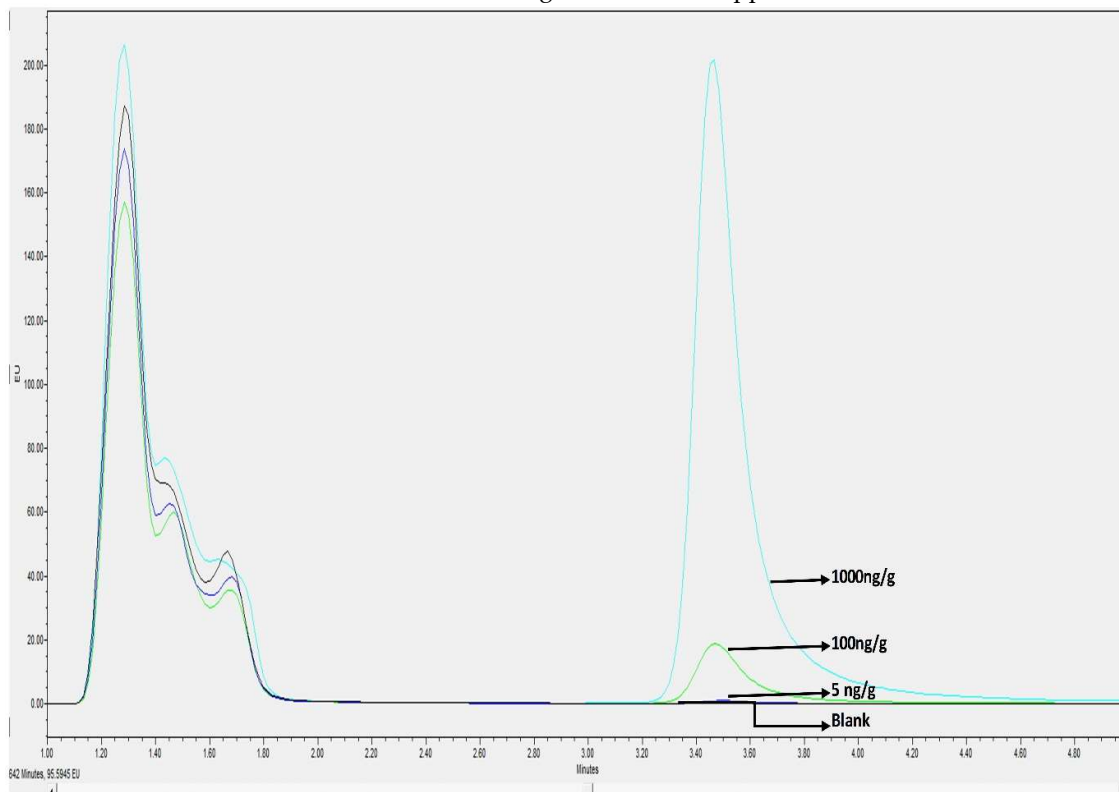

HPLC chromatogram of CTN in pear

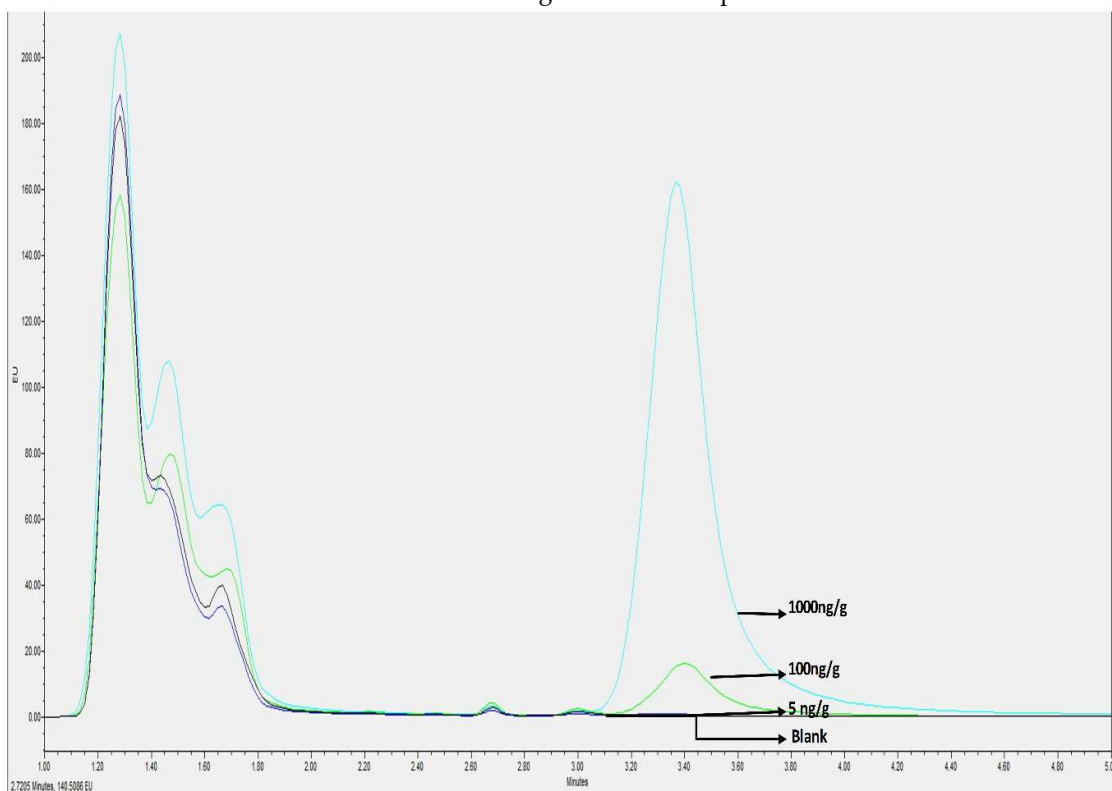

**Figure S1.** HPLC chromatograms of PAT and CTN in YES medium, apple and pear fruit samples

### YES medium spiked with PAT

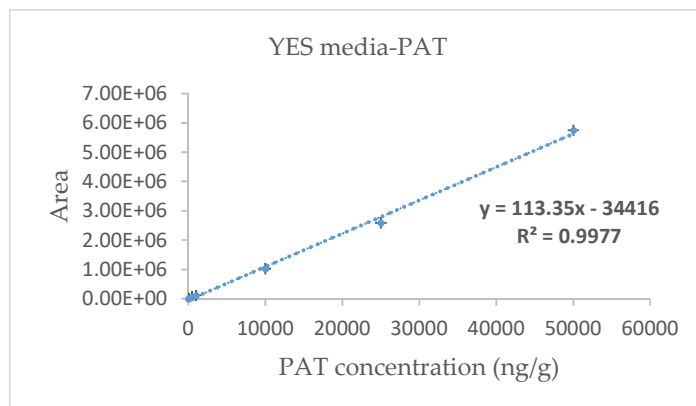

### Apple spiked with PAT

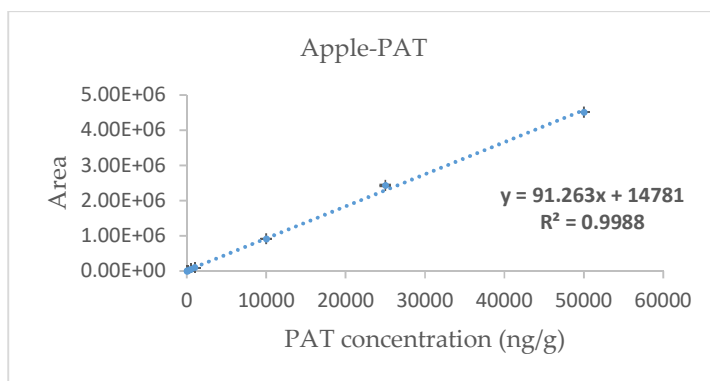

### Pear spiked with PAT

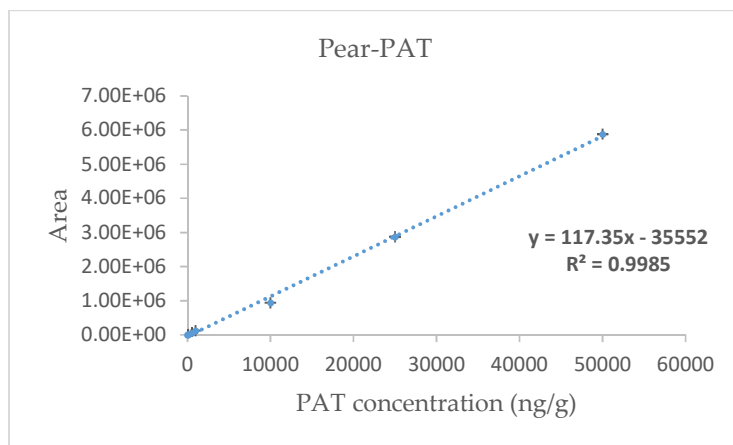

YES medium spiked with CTN

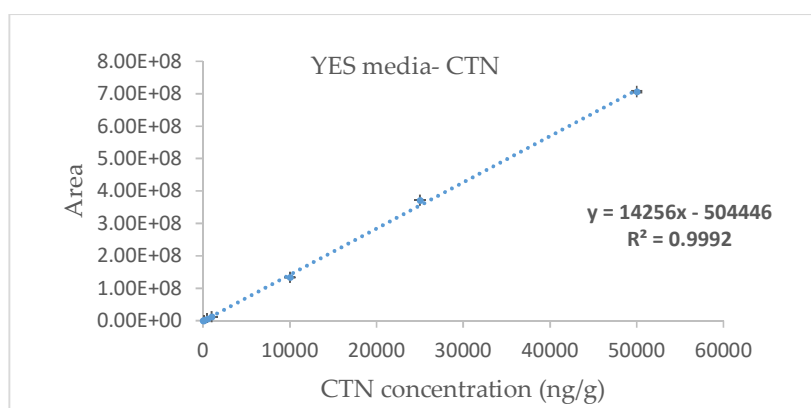

Apple spiked with CTN

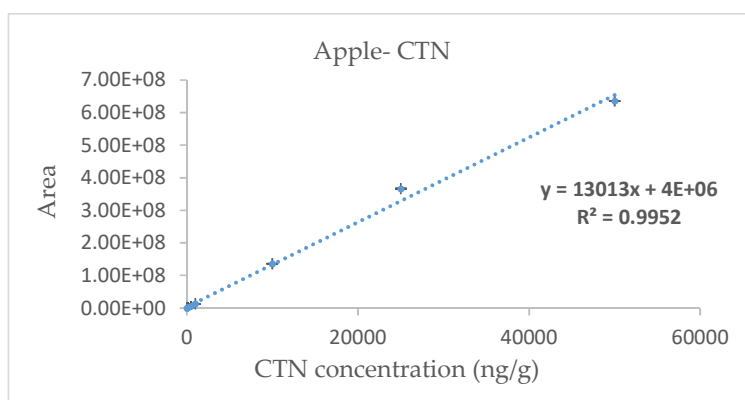

Pear spiked with CTN

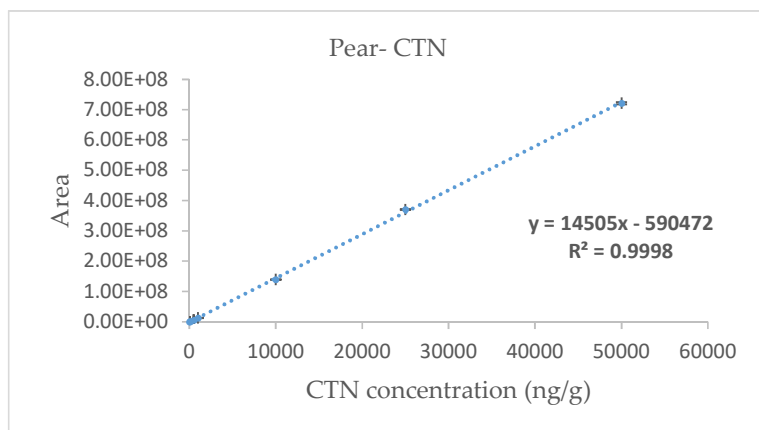

**Figure S2.** Calibration curves for PAT and CTN in YES medium, apple and pear fruit samples
